# Supplementary material for: Bio-inspired engineering of a zinc oxide/amino acid composite: synchrotron microstructure study
Source: Royal Society of Chemistry journal article supplement (doi:10.1039/c3ce42520g), 2014-01-01
Supplement: c3ce42520g1.pdf [file c3ce42520g1.pdf]

### Supplementary data:

**Table S1:** Crystallite size [nm] along (002), (100), (101), (102) and (110) crystallographic planes of reference ZnO and ZnO synthesized in the presence of different amino acids. The values in red represent crystallite size after mild thermal annealing. Red arrow indicates major decrease in crystallite size upon thermal annealing.

|                     | Crystallite size [nm]<br>(002) plane | Crystallite size [nm]<br>(100) plane | Crystallite size [nm]<br>(101) plane | Crystallite size [nm]<br>(102) plane | Crystallite size [nm]<br>(110) plane |
|---------------------|--------------------------------------|--------------------------------------|--------------------------------------|--------------------------------------|--------------------------------------|
| ZnO                 | 175.1<br>266.9                       | 40.7<br>43.6                         | 41.9<br>41.4                         | 26.2<br>25.2                         | 30.5<br>32.1                         |
| ZnO + aspartic acid | 58.4<br>▼ 47.2                       | 34.3<br>36.6                         | 34.5<br>34.9                         | 22.2<br>23.3                         | 27.8<br>28.7                         |
| ZnO + glutamic acid | 222.1<br>▼ 199.6                     | 212.0<br>▼ 184.2                     | 102.3<br>130.1                       | 84.7<br>107.1                        | 126.9<br>▼ 83.4                      |
| ZnO + cysteine      | 40.7<br>▼ 26.2                       | 23.6<br>16.0                         | 17.4<br>23.3                         | 11.2<br>13.7                         | 16.6<br>13.5                         |
| ZnO + selenocystine | 46.0<br>43.7                         | 18.8<br>19.9                         | 21.5<br>20.8                         | 14.8<br>14.8                         | 16.9<br>17.8                         |
| ZnO +serine         | 308.0<br>▼ 90.2                      | 193.7<br>▼ 26.7                      | 121.0<br>▼ 94.2                      | 155.8<br>▼ 55.2                      | 130.8<br>▼ 46.7                      |
| ZnO + lysine        | 78.7<br>94.3                         | 78.7<br>105.8                        | 83.3<br>88.0                         | 56.6<br>76.5                         | 62.7<br>▼ 43.1                       |
| ZnO + glycine       | 106.5<br>▼ 62.3                      | 31.3<br>34.5                         | 33.0<br>34.2                         | 22.0<br>22.9                         | 27.5<br>28.0                         |
| ZnO + tyrosine      | 51.9<br>▼ 40.2                       | 24.8<br>25.5                         | 25.0<br>25.3                         | 16.0<br>16.4                         | 20.0<br>19.9                         |
| ZnO + tryptophan    | 102.5<br>▼ 48.6                      | 30.0<br>33.7                         | 30.5<br>31.8                         | 18.3<br>20.0                         | 25.0<br>26.2                         |

**Table S2:** Microstrain fluctuations ( $\mu$ -strain fluct.) along (002), (100), (101), (102) and (110) crystallographic planes of reference ZnO and ZnO synthesized in the presence of different amino acids. The numbers in red represent value after mild thermal annealing. Red arrow indicates major increase in microstrain fluctuations upon thermal annealing.

|                     | $\mu$ -strain fluct.<br>(002) plane | $\mu$ -strain fluct.<br>(100) plane | $\mu$ -strain fluct.<br>(101) plane | $\mu$ -strain fluct.<br>(102) plane | $\mu$ -strain fluct.<br>(110) plane |
|---------------------|-------------------------------------|-------------------------------------|-------------------------------------|-------------------------------------|-------------------------------------|
| ZnO                 | 3.02E-03<br>4.67E-04                | 1.11E-03<br>1.02E-03                | 7.62E-04<br>7.89E-04                | 7.75E-04<br>8.66E-04                | 7.79E-04<br>6.41E-04                |
| ZnO + aspartic acid | 2.70E-03<br>▲ 3.30E-03              | 4.55E-03<br>4.52E-03                | 4.33E-03<br>4.64E-03                | 1.57E-03<br>1.29E-03                | 3.60E-03<br>4.19E-03                |
| ZnO + glutamic acid | 6.16E-04<br>▲ 7.61E-03              | 6.37E-04<br>▲ 9.27E-04              | 8.30E-04<br>9.42E-04                | 8.82E-04<br>8.91E-04                | 6.27E-04<br>9.43E-04                |
| ZnO + cysteine      | 4.58E-03<br>▲ 6.81E-03              | 1.82E-03<br>▲ 3.00E-03              | 2.07E-03<br>▲ 1.04E-02              | 2.21E-03<br>▲ 1.51E-02              | 1.49E-03<br>1.48E-03                |
| ZnO + selenocystine | 3.26E-03<br>4.05E-03                | 1.16E-03<br>▲ 9.23E-03              | 6.56E-03<br>5.91E-03                | 7.03E-04<br>9.31E-04                | 5.93E-03<br>5.98E-03                |
| ZnO +serine         | 5.46E-04<br>▲ 7.43E-03              | 8.21E-04<br>▲ 1.31E-03              | 1.39E-03<br>▲ 4.79E-03              | 1.31E-03<br>▲ 7.80E-03              | 1.02E-03<br>▲ 7.85E-03              |
| ZnO + lysine        | 1.19E-03<br>▲ 8.67E-03              | 1.19E-03<br>1.35E-03                | 1.20E-03<br>▲ 7.94E-03              | 1.08E-03<br>▲ 7.09E-03              | 1.21E-03<br>7.12E-04                |
| ZnO + glycine       | 1.87E-03<br>▲ 4.12E-03              | 4.38E-03<br>4.47E-03                | 4.57E-03<br>4.65E-03                | 1.36E-03<br>1.09E-03                | 3.60E-03<br>3.97E-03                |
| ZnO + tyrosine      | 2.99E-03<br>▲ 3.53E-03              | 6.88E-03<br>6.17E-03                | 5.48E-03<br>5.64E-03                | 3.21E-03<br>7.99E-03                | 4.29E-03<br>4.77E-03                |
| ZnO + tryptophan    | 1.60E-03<br>▲ 3.38E-03              | 4.68E-03<br>5.05E-03                | 4.43E-03<br>4.88E-03                | 1.80E-03<br>1.21E-03                | 3.60E-03<br>4.17E-03                |

**Table S3:** Change in crystallite size along (002) plane upon annealing (%), c-axis strain (%) and the change in band gap values before and after thermal annealing, of reference ZnO and ZnO synthesized in the presence of different amino acids.

| Incorporated amino acid into ZnO | % change in crystallite size along (002) plane | % c-axis strain | $\Delta E_g$ [eV] |
|----------------------------------|------------------------------------------------|-----------------|-------------------|
| -                                | -52.4%                                         | -               | -                 |
| Aspartic acid                    | 19.2%                                          | 0.097           | 0.02              |
| Glutamic acid                    | 10.1%                                          | 0.07            | 0.015             |
| Cysteine                         | 35.6%                                          | 0.203           | 0.12              |
| Selenocysteine                   | 5.0%                                           | 0.161           | 0.01              |
| Serine                           | 70.7%                                          | 0.031           | 0.03              |
| Lysine                           | -19.8%                                         | 0.108           | 0.06              |
| Glycine                          | 41.5%                                          | 0.055           | 0.01              |
| Tyrosine                         | 22.5%                                          | 0.102           | 0.07              |
| Tryptophan                       | 52.6%                                          | 0.094           | 0.035             |
